# Supplementary figures and images for: Patterns and seasonality in pediatric referrals for functional somatic symptoms
Source: HighWire-hosted journal article supplement (doi:10.1136/jim-2021-002252), 2022-06-30

**Online supplement:** Time between referral and appointment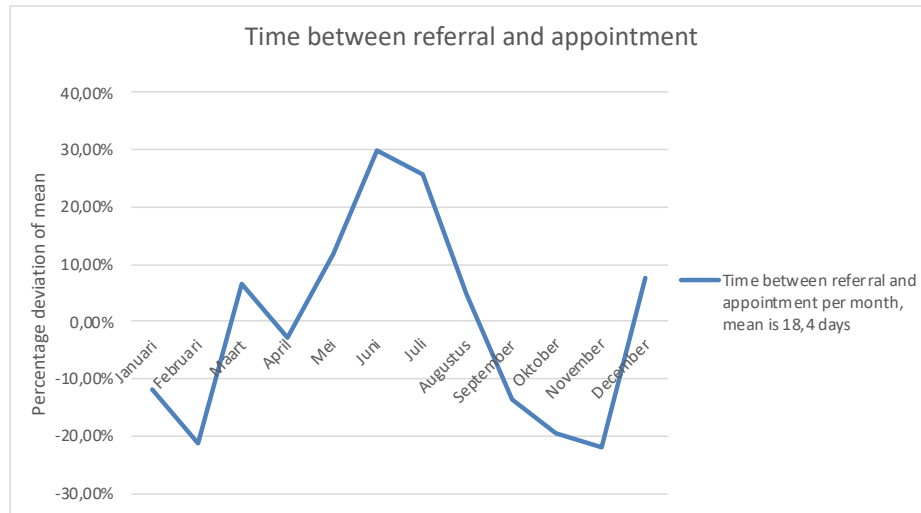

Supplement: jim-2021-002252supp001_data_supplement.pdf [file jim-2021-002252supp001_data_supplement.pdf]
